# Supplementary material for: Microwave-assisted one-pot synthesis of CrMnFeCoNi multimetallic nanoparticle-loaded UiO-66 for visible-light photocatalytic degradation of methylene blue
Source: Royal Society of Chemistry journal article supplement (doi:10.1039/d6ra03021a), 2026-05-18
Supplement: d6ra03021a1.pdf [file d6ra03021a1.pdf]

**Microwave-Assisted One-Pot Synthesis of CrMnFeCoNi Multimetallic  
Nanoparticle-Loaded UiO-66 for Visible-Light Photocatalytic Degradation of  
Methylene Blue**

Mostafa Khajeh<sup>a,b,\*</sup>, Mansour Ghaffari-Moghaddam<sup>a,b</sup>, Afsaneh Barkhordar<sup>a</sup>

<sup>a</sup> Department of Chemistry, Faculty of Science, University of Zabol, Zabol, Iran

<sup>b</sup> Advanced Materials & Manufacturing Laboratory, University of Zabol, Zabol, Iran

\* Corresponding authors.

*E-mail addresses:* m\_khajeh@uoz.ac.ir (M. Khajeh)

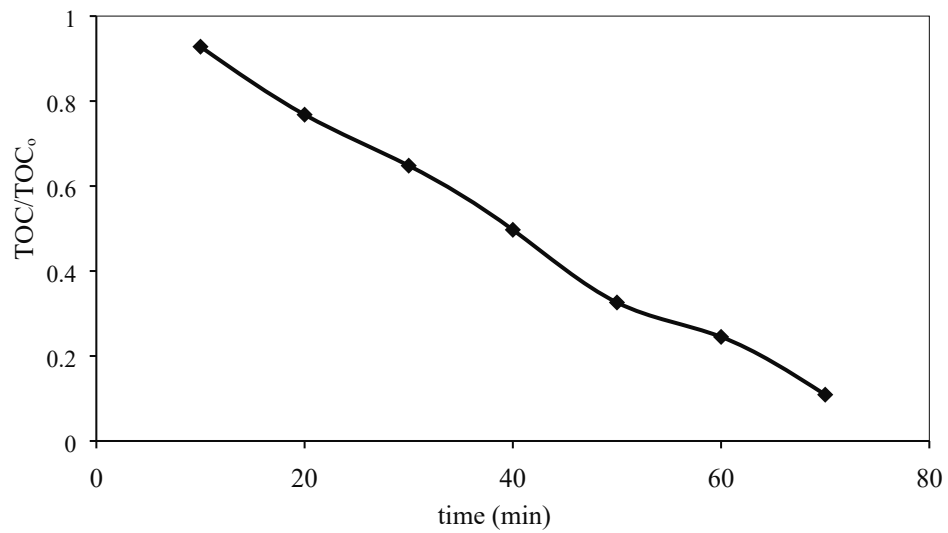

**Fig. S1** The TOC concentration in the sample solutions for MB

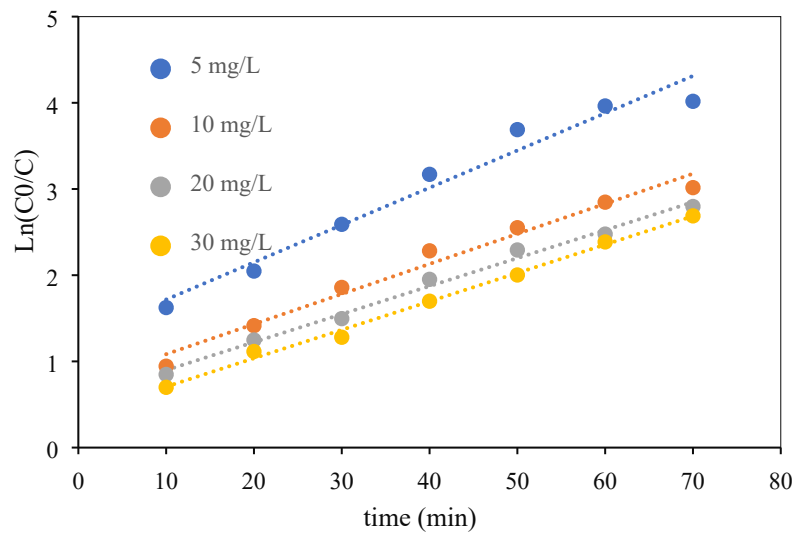

**Figure S2.** Linear regression fitting with a first-order model at different concentrations for MB

**Table S1.** The theoretical factors for fitting degradation data with First-order kinetic models by various concentrations of MB

| Concentration of MB<br>( $mg L^{-1}$ ) | First order |        |
|----------------------------------------|-------------|--------|
|                                        | $R^2$       | $K_1$  |
| 5                                      | 0.964       | 0.0432 |
| 10                                     | 0.977       | 0.0349 |
| 20                                     | 0.9914      | 0.0325 |
| 30                                     | 0.995       | 0.033  |

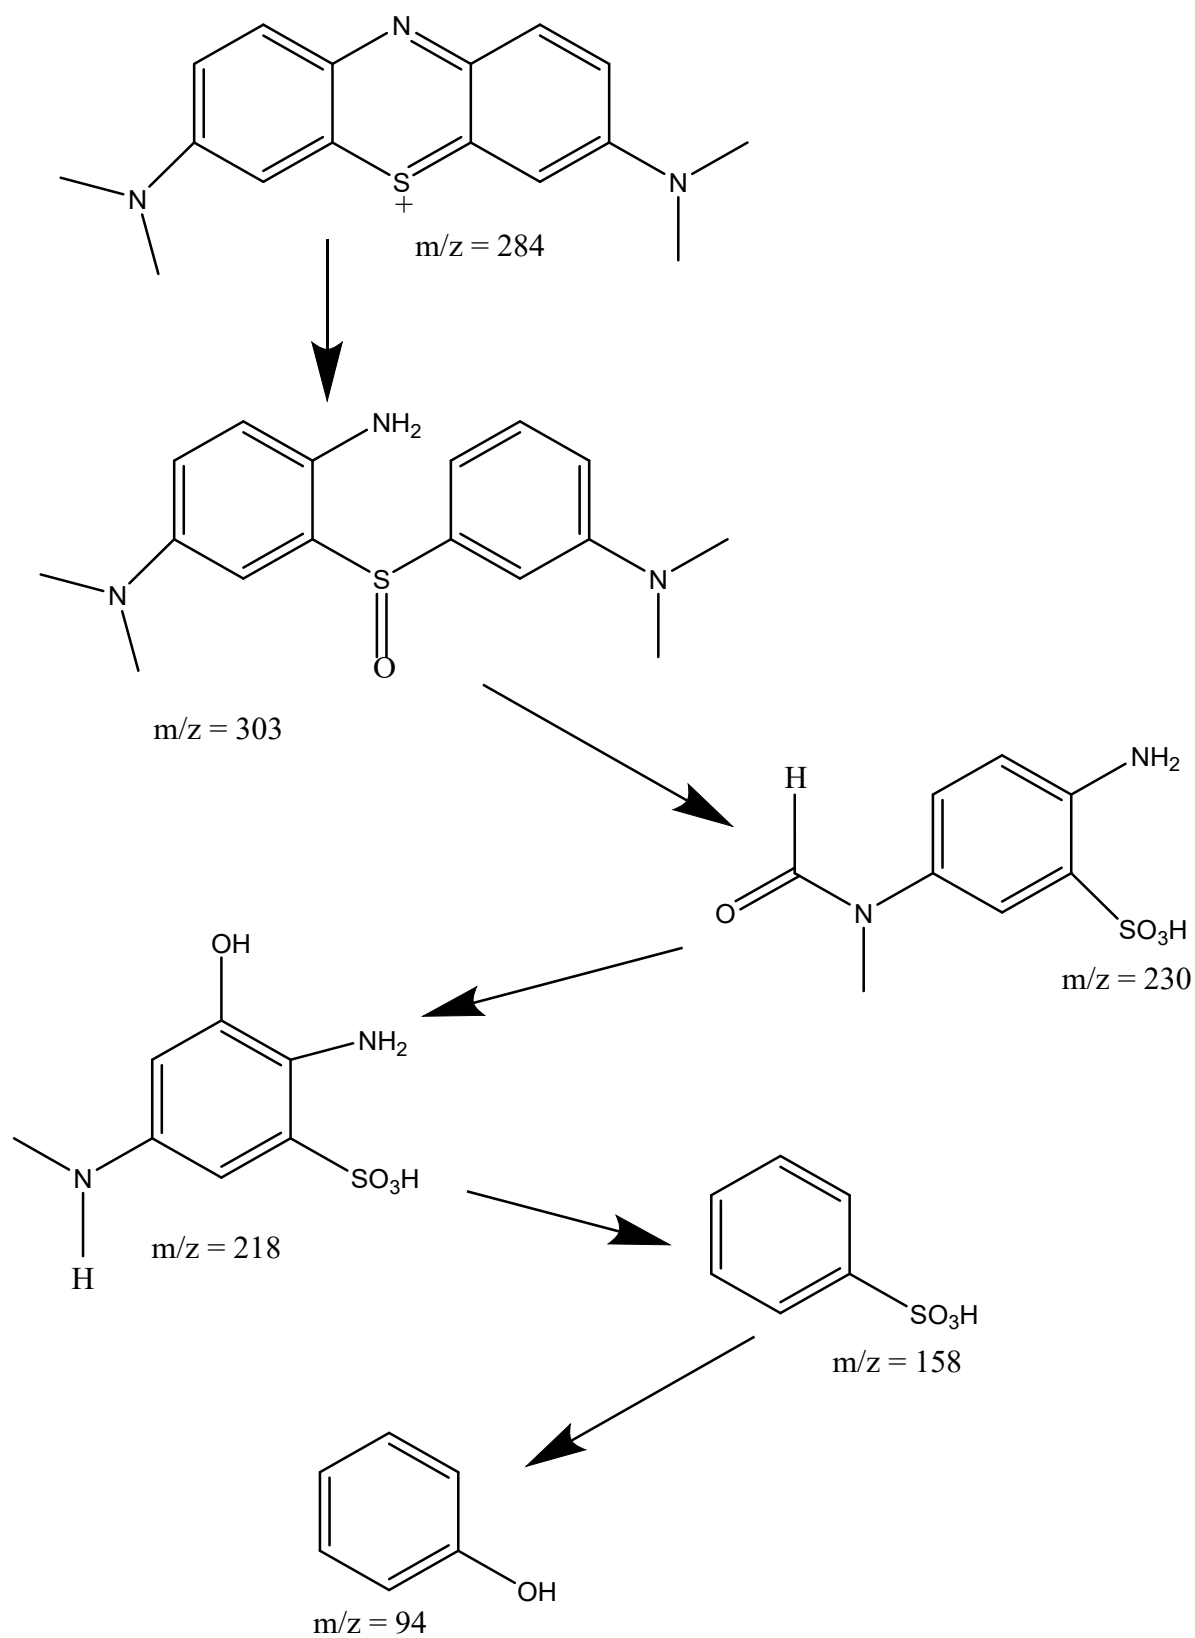

**Fig. S3** Degradation pathway of MB
